# Supplementary material
Source: PubMed Central journal article supplement (PMC2234136)

**A**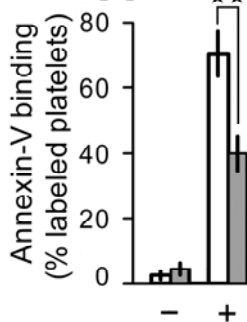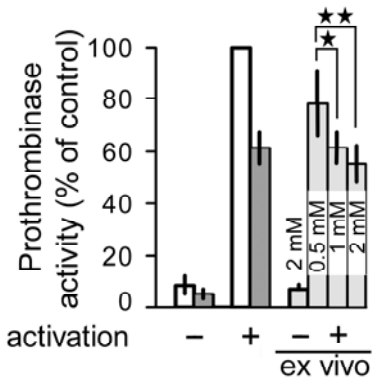**B**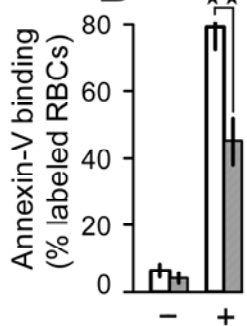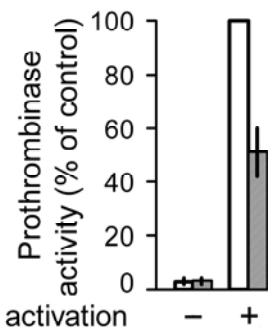

Supplement: pnas_0706867105_1.pdf [file pnas_0706867105_1.pdf]

PS & PC in inner leaflet (%)

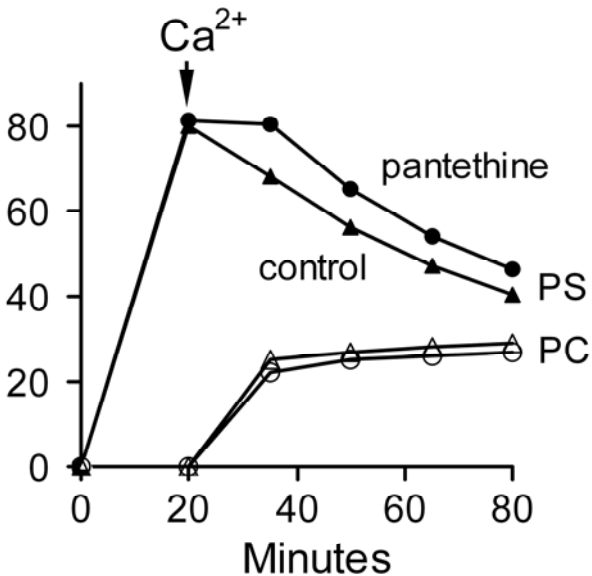

Supplement: pnas_0706867105_2.pdf [file pnas_0706867105_2.pdf]

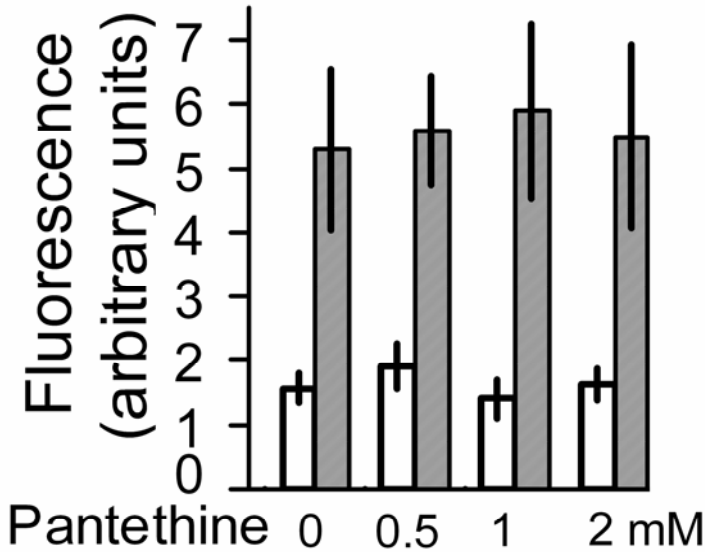

Supplement: pnas_0706867105_3.pdf [file pnas_0706867105_3.pdf]
